32 **ABSTRACT**

33 The hematopoietic system is maintained throughout life by hematopoietic stem cells that are  
34 capable of differentiating into all hematopoietic lineages. An intimate balance between self-  
35 renewal, differentiation, and quiescence is required to maintain hematopoiesis. Disruption of this  
36 balance can result in hematopoietic malignancy, including acute myeloid leukemia (AML).  
37 FBXO9, from the F-box E3 ubiquitin ligases, is down-regulated in patients with AML compared  
38 to normal bone marrow. FBXO9 is the substrate recognition component of the Skp1-Cullin-F-  
39 box (SCF)-type E3 ligase complex. *FBXO9* is highly expressed in hematopoietic stem and  
40 progenitor populations, which contain the tumor-initiating population in AML. In AML patients,  
41 decrease in *FBXO9* expression is most pronounced in patients with the inversion of  
42 chromosome 16 (*inv(16)*), a rearrangement that generates the transcription factor fusion gene,  
43 *CBFB-MYH11*. To study FBXO9 in malignant hematopoiesis, we generated a conditional  
44 knockout mouse model using a novel CRISPR/Cas9 strategy. Our data show that deletion of  
45 *Fbxo9* in mice expressing *Cbfb-MYH11* leads to markedly accelerated and aggressive leukemia  
46 development. In addition, we find loss of FBXO9 leads to increased proteasome expression and  
47 tumors are more sensitive to bortezomib suggesting that FBXO9 expression may predict patient  
48 response to bortezomib treatment.

49

50

## 51 INTRODUCTION

52 Acute myeloid leukemia (AML) is a hematologic malignancy resulting in an accumulation of  
53 immature myeloid blasts impairing normal hematopoiesis<sup>1</sup>. This disease accounts for 35% of  
54 new leukemia diagnoses and 48% of leukemia-related deaths<sup>2</sup>. In 2019, AML is estimated to be  
55 the most frequently diagnosed leukemia and the only common form with a higher mortality rate  
56 than incidence. Although new therapies have recently been approved, they are limited to  
57 specific subtypes of AML and only increase the treatment options for limited subsets of  
58 patients<sup>3-6</sup>. To develop more effective and less toxic therapies for use across multiple subtypes,  
59 we must better understand the mechanisms underlying development and progression of AML.

60

61 One system that has not been extensively studied in the context of AML is the ubiquitin  
62 proteasome system (UPS). The UPS coordinates the degradation of proteins globally and  
63 compartmentally within a cell and is a key regulatory mechanism for many cellular processes  
64 including cell cycle, transcription, and proliferation<sup>7</sup>. Two main components of this system are  
65 the E3 ubiquitin ligases that determine substrate specificity and the 26S proteasome  
66 responsible for protein degradation. This system has proven to be a viable target in hematologic  
67 malignances either through targeting the 26S proteasome with drugs such as bortezomib<sup>8</sup> or by  
68 altering substrate recognition of E3 ligases as is done with thalidomide<sup>9</sup>. The successful  
69 utilization of these drugs in other hematologic malignancies suggests that targeting the UPS in  
70 AML could prove effective in treating the disease.

71

72 Ubiquitin E3 ligases can be classified as RING-finger, HECT-domain, or RBR based on their  
73 domains and mode of transferring ubiquitin to the substrate<sup>10</sup>. The largest family of E3 ligases,  
74 the Skp1-Cul1-F-box (SCF) family, is composed of a core complex including S-phase kinase-  
75 associated protein 1 (Skp1) and Cullin 1 (Cul1) which are scaffolding proteins that bring the  
76 ubiquitin binding RING-finger protein Rbx in proximity with the substrate recognition F-box

77 protein component<sup>11</sup>. There are 69 F-box proteins that interact with Skp1 via the F-box domain  
78 and with substrate proteins through a variety of substrate-recognition domains<sup>12,13</sup>.  
79 Dysregulation of E3 ligases, including many F-box proteins, has been correlated with aberrant  
80 hematopoiesis and malignant transformation<sup>14,15</sup>. Many proteins from the F-box family have  
81 been classified as tumor suppressors, others as oncogenes, and a third set with context-specific  
82 roles<sup>16</sup>. FBXW7, for example, plays an integral role in hematopoietic stem and progenitor cell  
83 (HSPC) self-renewal and its loss has been linked to drug resistant T-cell acute lymphoblastic  
84 leukemia, whereas loss in chronic myeloid leukemia (CML) inhibits initiation and progression of  
85 disease<sup>17-19</sup>. Loss of FBXO4 increases extramedullary myeloid hematopoiesis and is highly  
86 expressed in various lymphomas<sup>20</sup>. Other family members have been linked to leukemia cell  
87 proliferation, including FBXL2, FBXL10, FBXW11, and SKP2<sup>21-24</sup>. Furthermore, overexpressed  
88 FBXO9 in multiple myeloma (MM) degraded TEL2 and TTI1, shifting signaling from mTORC1 to  
89 mTORC2, thus causing increased proliferation and survival<sup>25</sup>.

90

91 In this study, we identified FBXO9 as an important regulator of AML and found it has low  
92 expression in patients across all AML subtypes. To study the role of *Fbxo9* in AML, we  
93 developed a conditional knockout (cKO) mouse model and monitored the leukemia response *in*  
94 *vivo*. We utilized a mass spectrometry (MS)-based approach to identify proteins upregulated  
95 when *Fbxo9* expression is lost in tumors and identified various proteins previously shown to  
96 participate in cancer-related mechanisms such as metastasis, proliferation, invasion, and  
97 metabolism. Of particular interest, we found that many upregulated proteins participate in  
98 proteasome-regulated pathways. Furthermore, our *in vitro* analysis found that cKO tumors had  
99 increased proteasome activity and responded better to bortezomib treatment. Our studies  
100 provide insight into the role of the UPS in AML and present evidence that selecting patients  
101 according to *FBXO9* expression could be used as a method of identifying tumors to treat with  
102 proteasome inhibitors.

103

## 104 RESULTS

105

### 106 ***FBXO9 has low expression in AML and expression correlates to poor survival***

107 To identify F-box proteins involved in initiation and/or progression of AML, we analyzed patient  
108 data from the Leukemia MILE study for expression of 61 F-box proteins<sup>26</sup>. Analysis revealed  
109 that *FBXO9* has the lowest expression in inv(16), MLL-rearranged, and t(8;21) AMLs among the  
110 F-box proteins. Additionally, when compared to healthy bone marrow (HBM), CML and  
111 myelodysplastic syndrome, *FBXO9* showed decreased expression (Figure 1A, S1A). Further  
112 analysis across a wider variety of AML subtypes, including normal and complex karyotype and  
113 t(15;17), revealed that *FBXO9* is consistently down-regulated across all subtypes (Figure 1B).  
114 As AML is the second most common childhood leukemia, we utilized the TARGET pediatric  
115 study to analyze *FBXO9* expression and again found down-regulation of *FBXO9* in all AML sub-  
116 types except patients with normal karyotype (Figure 1C)<sup>27</sup>.

117

118 Correlation of expression versus survival in adult and pediatric patients revealed that adult  
119 patients with *FBXO9* expression below the median tend to have a worse prognosis and shorter  
120 time of survival compared to patients with expression above the median, although not significant  
121 (Figure 1D, S1B). However, analysis of pediatric patients within the first 2000 days post  
122 diagnosis demonstrated that low *FBXO9* expression correlated with poor survival (Figure 1E).  
123 Patients who went in remission and survived over 2000 days post initial diagnosis had no  
124 significant difference in survival with any of the sub-types (Figure S1C-H)<sup>28</sup>. Taken together,  
125 these findings suggest that *FBXO9* expression is decreased in AML cells and that low  
126 expression correlates with poor survival at early time-points from initial diagnosis.

127

### 128 ***Generation of conditional knockout of Fbxo9***

129 To study the role of *Fbxo9* in hematopoiesis and AML, we generated a cKO mouse model.  
130 FBXO9 has two known domains, the F-box domain for binding the SCF complex and the  
131 protein-binding TPR domain<sup>11</sup>. Using the Easi-CRISPR method, we introduced LoxP sites  
132 flanking *Fbxo9* exon 4, which contains the majority of the TPR domain (Figure 2A)<sup>29</sup>. The  
133 targeted mouse was bred with an Mx1-cre mouse in which cre expression in the hematopoietic  
134 system is induced by the Mx1 promoter through administration of Polyinosinic:Polycytidilic acid  
135 (Poly(I:C))<sup>30</sup>.

136

137 We confirmed the genotypes by PCR and analyzed *Fbxo9* expression in replicate *Fbxo9*<sup>+/-</sup> and  
138 *Fbxo9*<sup>-/-</sup> mice compared to *Fbxo9*<sup>+/+</sup>. The expression within BM of our cKO groups was reduced  
139 ~55% *Fbxo9*<sup>+/-</sup> and ~80% *Fbxo9*<sup>-/-</sup> (Figure 2B-C). Loss of exon 4 results in ablation of TPR  
140 binding and initiates a frame-shift mutation leading to loss of the F-box domain and a premature  
141 stop as confirmed by PCR and sequencing in our mouse model (Figure S2A). Additionally, we  
142 transfected *Fbxo9* mutant plasmids into 293T cells. Mutants lacking the F-box or TPR domains  
143 showed a slight decrease in molecular weight whereas the mutant lacking bases corresponding  
144 to exon 4 showed a much greater decrease in molecular weight (Figure S2B). The band size  
145 correlated with the predicted molecular weight of a protein arising from cKO cells. This evidence  
146 indicates that deletion of exon 4 in our mouse model results in a truncated protein lacking the  
147 TPR and F-box domains.

148

#### 149 ***Fbxo9* deletion leads to alterations in HSPC populations**

150 By analyzing different hematopoietic populations isolated from BM of a healthy WT mouse, we  
151 found that *Fbxo9* is most highly expressed in short- and long-term HSCs as well as some  
152 myeloid lineages (Figure 3A). To study the role of *Fbxo9* in normal hematopoiesis, we deleted  
153 *Fbxo9* by 3 sequential injections with Poly(I:C). Flow cytometry analysis of the BM 4 weeks  
154 post-Poly(I:C) revealed no significant difference in cell number or distribution of mature

155 hematopoietic populations (myeloid, T-lymphoid, or B-lymphoid); however, the lineage negative  
156 cells, which include HPSCs, showed a decrease in total number upon loss of *Fbxo9* (Figure 3B-  
157 C, S3A-D). Further analysis of the HSPCs revealed that *Fbxo9* cKO results in increased stem  
158 and early progenitor cells (LSK), specifically the multipotent progenitors (Figure 3D-E, S3D).  
159 The cKit<sup>+</sup> progenitor population (cKit<sup>+</sup>) decreased in total number due to a decrease in  
160 megakaryocyte-erythroid progenitors (Figure 3F). To determine whether loss of *Fbxo9* alters  
161 differentiation of HSPCs, we carried out a colony forming cell assay and found that LSKs  
162 derived from *Fbxo9*<sup>+/-</sup> and *Fbxo9*<sup>-/-</sup> gave rise to fewer colonies, showing decreased ability of  
163 HSPCs to differentiate and proliferate in response to cytokine stimulation (Figure 3G). We  
164 further analyzed these populations for cell cycle changes and found an increased number of  
165 cKit<sup>+</sup> cells and LSKs in a quiescent G<sub>0</sub> state (Figure 3H, S3D). Together these results suggest  
166 that HSPC populations are more quiescent and have decreased differentiation.

167

### 168 ***Deletion of Fbxo9 leads to an aggressive and immature AML phenotype***

169 The lowest expression of *FBXO9* was found in the inv(16) subtype of AML. Inv(16)/t(16;16)  
170 arises from an inversion or translocation within chromosome 16 that fuses the genes for core  
171 binding factor beta (*Cbfb*) and smooth muscle myosin heavy chain (*MYH11*)<sup>31</sup>. The resulting  
172 CBFβ-SMMHC fusion protein alters Runt-related protein 1 (RUNX1, formerly AML1) activity, a  
173 transcription factor important in hematopoietic regulation, which leads to a block in  
174 differentiation of myeloid progenitor cells<sup>32,33</sup>. To study the role of *Fbxo9* in inv(16) AML, we  
175 crossed our *Mx<sup>Cre</sup>Fbxo9<sup>ff</sup>* mouse with the floxed allele of *Cbfb-MYH11* (*Cbfb<sup>+56M</sup>*) which allows  
176 for inducible expression of CBFβ-SMMHC following administration of Poly(I:C)<sup>32</sup>. In mice,  
177 expression of the *Cbfb<sup>+56M</sup>* allele is sufficient to initiate the formation of AML with a median  
178 survival of approximately 20 weeks<sup>32</sup>. We confirmed the presence of *Cbfb<sup>56M</sup>* within the offspring  
179 prior to Poly(I:C) treatment and confirmed deletion of exon 4 and expression of *Cbfb-MYH11*  
180 following Poly(I:C) by PCR (Figure 2B).

181

182 To monitor disease onset, we performed flow cytometry on peripheral blood (PB) beginning 3  
183 weeks post-Poly(I:C) injection. Cell surface markers for mature myeloid cells Gr1 and CD11b  
184 were analyzed along with cKit to identify immature AML blasts. Analysis revealed that  
185 *Cbfb*<sup>+56M</sup>*Fbxo9*<sup>+/+</sup> mice tend to have early (2-3 weeks) expression of cKit<sup>+</sup> cells that diminishes  
186 at weeks 6 and 9. Although not significantly different, the kinetics of the cKit<sup>+</sup> tumor population  
187 following *Fbxo9* deletion conversely expands at weeks 6 and 9 (Figure 4A). In addition, we  
188 found that most of the mice developed AML within the expected latency period, though the  
189 *Cbfb*<sup>+56M</sup>*Fbxo9*<sup>+/-</sup> group had a significantly shorter time of survival with a median survival of 13  
190 weeks compared to 17 weeks in *Cbfb*<sup>+56M</sup>*Fbxo9*<sup>-/-</sup> and 20 weeks in *Cbfb*<sup>+56M</sup>*Fbxo9*<sup>+/+</sup> cohorts  
191 (Figure 4B).

192

193 Consistent with previously reported data, ~80% of mice in the *Cbfb*<sup>+56M</sup>*Fbxo9*<sup>+/+</sup> control group  
194 had tumors with a predominantly blast-like population, expressing the cell surface marker cKit,  
195 and ~20% expressed the more mature cell surface markers Gr1 and CD11b<sup>32</sup>. Upon deletion of  
196 *Fbxo9*, all of the mice from both *Cbfb*<sup>+56M</sup>*Fbxo9*<sup>-/-</sup> and *Cbfb*<sup>+56M</sup>*Fbxo9*<sup>+/-</sup> cohorts developed blast-  
197 like tumors expressing cKit on the cell surface and lacking Gr1/CD11b expression, suggesting a  
198 more immature phenotype (Figure 4C-D, S4A). Consequently, cKO mice had greater  
199 expression of cKit in BM upon sacrifice indicating a greater tumor burden in the BM upon loss of  
200 one or both *Fbxo9* alleles (Figure 4C). These data showed that *Cbfb*<sup>+56M</sup>*Fbxo9*<sup>+/-</sup> results in a  
201 shorter time of survival and both *Cbfb*<sup>+56M</sup>*Fbxo9*<sup>+/-</sup> and *Cbfb*<sup>+56M</sup>*Fbxo9*<sup>-/-</sup> give rise to tumors with  
202 a more immature phenotype.

203

204 In addition, we analyzed secondary organs for signs of infiltration. The spleens from all groups  
205 had splenomegaly (Figure S4B). H&E staining of spleen infiltration demonstrated that ~60% of  
206 *Cbfb*<sup>+56M</sup>*Fbxo9*<sup>-/-</sup> mice had complete effacement of the spleen architecture compared to only



207 30% of *Cbfb*<sup>+56M</sup>*Fbxo9*<sup>+/+</sup> mice (Figure 4E-F). Likewise, in the liver *Cbfb*<sup>+56M</sup>*Fbxo9*<sup>-/-</sup> mice had  
208 ~50% infiltration in half the cohort indicating a more aggressive disease even though they had a  
209 similar time of survival to *Cbfb*<sup>+56M</sup>*Fbxo9*<sup>+/+</sup> mice (Figure 4G). These findings suggest that loss  
210 of *Fbxo9* leads to increased infiltration of spleen and liver.

211

### 212 ***Transplanted tumors with reduced Fbxo9 lead to rapid onset of disease***

213 Development of primary AML tumors demonstrated that loss of *Fbxo9* alters the AML  
214 phenotype. To determine whether *Fbxo9* is acting in a tumor initiating or tumor-promoting  
215 fashion, we carried out a secondary transplantation. Tumor cells from spleens were injected into  
216 sub-lethally irradiated recipient mice. To eliminate bias from tumor phenotype, we selected  
217 primary splenic tumor cells with a cKit<sup>+</sup> phenotype (Figure 5A). All tumors selected contained  
218 >90% tumor burden with the exception of one *Cbfb*<sup>+56M</sup>*Fbxo9*<sup>+/+</sup> tumor with only 75% cKit<sup>+</sup>  
219 spleen cells. The mouse was selected due to aggressive nature of the tumor which resulted in  
220 the shortest survival from the *Cbfb*<sup>+56M</sup>*Fbxo9*<sup>+/+</sup> cohort.

221

222 We followed the development of AML and by 5 weeks post-transplant *Cbfb*<sup>+56M</sup>*Fbxo9*<sup>-/-</sup> mice  
223 had on average 69.6% tumor PB indicating that tumors with decreased *Fbxo9* develop more  
224 rapidly (Figure 5B, S5A). The rapid expansion of the tumor population led to decreased time of  
225 survival in *Cbfb*<sup>+56M</sup>*Fbxo9*<sup>+/-</sup> and *Cbfb*<sup>+56M</sup>*Fbxo9*<sup>-/-</sup> cohorts compared to *Cbfb*<sup>+56M</sup>*Fbxo9*<sup>+/+</sup> mice  
226 (Figure 5C). Upon sacrifice, analysis of the BM, spleen, and PB by flow cytometry showed no  
227 difference in tumor burden between the three cohorts (Figure S5B). Secondary transplantation  
228 confirms that tumors lacking *Fbxo9* are aggressive and lead to rapid progression of AML.

229

### 230 ***Loss of Fbxo9 leads to up-regulation of proteins associated with tumorigenicity***

231 To identify potential *Fbxo9* substrates and protein alterations in AML, we performed quantitative  
232 MS on splenic tumor cells. We labeled proteins isolated with tandem mass tags, combined

233 equal concentrations from each sample, and analyzed by MS (LC-MS/MS) (Figure 6A). Mass  
234 spectrometry identified 18696 unique peptides representing 3580 proteins, 3247 of which were  
235 quantifiable (Figure 6B). To quantify protein changes, we compared only proteins with  $\geq 3$  unique  
236 peptides. Between  $Cbfb^{+/56M}Fbxo9^{+/-}$  and  $Cbfb^{+/56M}Fbxo9^{-/-}$  cohorts, 118 proteins were  
237 significantly up-regulated ( $p < 0.05$ , fold change  $\geq 1.3$ ) and 86 proteins were significantly down-  
238 regulated ( $p < 0.05$ , fold change  $\leq 0.7$ ) in one or both cohorts (Figure 6C, Table S1).

239  
240 The majority of these differentially expressed proteins localized to the cytoplasm where FBXO9  
241 is expressed (Figure 6D). To determine whether tumors with different genotypes show distinct  
242 patterns of expression, we carried out a principle component analysis and hierarchical clustering  
243 and found that 3 independent tumors with WT expression of *Fbxo9* clustered together while  
244 heterozygous and homozygous cKO tumors clustered together, indicating they are more similar  
245 to each other than to  $Cbfb^{+/56M}Fbxo9^{+/+}$  tumors (Figure 6E-F). Interestingly, a number of the top  
246 up-regulated proteins identified (PFKP, ADK, ARF1, TOMM34, DIAPH1, and WDR1) have been  
247 shown to participate in cancer by increasing cell growth and metastasis or are biomarkers for  
248 poor outcome (Figure 6F)<sup>34-39</sup>.

249

### 250 ***Loss of Fbxo9 correlates with increased proteasome activity***

251 The proteins overexpressed upon loss of *Fbxo9* were also enriched for proteins associated with  
252 proteasome-mediated pathways such as proteolysis and ubiquitin- or proteasome-dependent  
253 catabolism (Figure 7A). Increased proteasome activity has previously been implicated in cancer  
254 aggression and proteasome inhibitors have been approved as a treatment option<sup>40</sup>. Considering  
255 this strong correlation between cancer and proteasome activity, we confirmed proteasome  
256 component overexpression by western blot and observed an increase in differentially expressed  
257 proteasome components in tumors lacking *Fbxo9* (Figure 7B-C). To confirm that proteasome  
258 component expression correlates with increased activity *in vitro*, we performed a proteasome

259 activity assay comparing our tumor groups. This confirmed that not only does loss of *Fbxo9*  
260 result in increased proteasome component expression, but that this expression correlates with  
261 increased proteasome activity in the *Cbfb*<sup>+56M</sup>*Fbxo9*<sup>+/-</sup> and *Cbfb*<sup>+56M</sup>*Fbxo9*<sup>-/-</sup> tumors (Figure 7D).  
262 To further elucidate the effect of loss of *Fbxo9* in AML, we treated cultured tumor cells with  
263 varying concentrations of proteasome inhibitor bortezomib (Figure 7E). Bortezomib treatment  
264 confirmed that *Cbfb*<sup>+56M</sup>*Fbxo9*<sup>-/-</sup> tumor cells are more sensitive to proteasome inhibition than  
265 *Cbfb*<sup>+56M</sup>*Fbxo9*<sup>+/+</sup> tumor cells with IC<sub>50</sub> calculations of 10.03nM and 11.76nM, respectively.  
266 Furthermore, analysis of apoptosis and cell death demonstrated that *Cbfb*<sup>+56M</sup>*Fbxo9*<sup>-/-</sup> tumor  
267 cells are more sensitive to treatment with bortezomib than *Cbfb*<sup>+56M</sup>*Fbxo9*<sup>+/+</sup> tumor cells (Figure  
268 7F). These studies provide evidence that loss of *Fbxo9* leads to increased proteasome activity  
269 and sensitivity to proteasome inhibitors like bortezomib.

270

## 271 DISCUSSION

272 The molecular pathogenesis of AML has yet to be fully defined, though many acquired  
273 molecular and cytogenetic abnormalities have been identified that lead to leukemogenesis<sup>41</sup>.  
274 The majority of these alterations are thought to occur in the HSPCs and disease progression is  
275 often thought to progress through the dysregulation of normal cellular mechanisms<sup>42</sup>. As FBXO9  
276 is an E3 ligase highly expressed in HSPCs (the tumor initiating population) it is imperative to  
277 understand the resulting changes in HSPC function upon loss of its expression. We first report  
278 that loss of *Fbxo9* correlates with a decrease in the Lin<sup>-</sup> cells of the BM but an increase in the  
279 LSKs within that compartment. Second, we show that the increase is due to an expansion of  
280 quiescent cells in G<sub>0</sub> phase of the cell cycle which leads to a decrease in colony formation when  
281 these HSPCs are in culture. To further understand the mechanistic changes associated with  
282 disease initiation and progression, it is essential to determine the role FBXO9 plays in the tumor  
283 initiating population.

284

285 Aberrant FBXO9 expression has previously been linked to disease progression in MM by  
286 tagging mTORC1 components for degradation<sup>25</sup>. In this context, its overexpression was shown  
287 to promote disease progression and FBXO9 has previously been classified as an oncogene.  
288 Contrary to its role in MM, our studies demonstrate that *FBXO9* expression is consistently  
289 decreased across AML subtypes and that reduction of its E3 ligase activity promotes the  
290 progression of AML and correlates with a shorter time of survival. Additionally, MS experiments  
291 did not show accumulation of the known substrates TEL2 and TTI1 identified in MM. This finding  
292 demonstrates that FBXO9 plays a context-specific role in cancer, acting as an oncogene in MM  
293 and a tumor suppressor in AML. While other F-box proteins have been shown to have solely  
294 oncogenic or tumor suppressor roles, FBXO9 is among a few select members of the family that  
295 can function in both capacities<sup>16</sup>. Furthermore, we found that loss of a single copy of *Fbxo9* was  
296 sufficient to cause increased aggressiveness in AML tumor cells. Considering that FBXO9 is an  
297 E3 ligase, we must elucidate the alterations that loss of this protein causes in the proteomic  
298 landscape of AML cells.

299  
300 Through interrogation of the proteomic changes occurring in AML tumor cells upon loss of  
301 *Fbxo9*, we identified various proteasome components and proteasome-related proteins that  
302 were upregulated. Increased proteasome activity has been associated with aggressiveness in  
303 many cancer subtypes through *in vitro* and *in vivo* studies<sup>43-46</sup>. Ma *et al.* reported that AML  
304 patients have higher levels of 20S proteasome components compared to healthy controls but  
305 that this increase does not lead to increased chymotrypsin-like activity due to a reduction in  
306 expression of the 19S regulatory component<sup>47</sup>. Similarly, our data showed increased  
307 proteasome component expression of the 20S catalytic subunit (PSMA and PSMB) in  
308 *Cbfb*<sup>+56M</sup>*Fbxo9*<sup>-/-</sup> compared to *Cbfb*<sup>+56M</sup>*Fbxo9*<sup>+/+</sup>. Unlike the results produced by Ma *et al.*, we  
309 saw increased expression in the 19S (PSMD) components indicating that loss of *Fbxo9* could  
310 correspond with altered proteasome activity. Further analysis revealed that increased

311 component expression did, indeed, lead to increased proteasome activity, suggesting a causal  
312 relationship.

313

314 Proteasome inhibition with drugs such as bortezomib has become standard of care for patients  
315 with MM and has been effectively utilized as a second-line therapy in treating mantle cell  
316 lymphoma and follicular lymphoma<sup>48-50</sup>. Clinical trials using bortezomib, either alone or in  
317 combination with other chemotherapies, have reported varying complete remission rates  
318 ranging from 0-80%<sup>51-57</sup>. To date, no correlation has been made between AML classification and  
319 patients who respond well to proteasome inhibition. Indeed, responses seem to be independent  
320 of AML subtype. Additionally, one of the main impediments to achieving complete remission in  
321 AML stems from the inability of current therapies to target the leukemic stem cells. Proteasome  
322 inhibitors have previously been effective in targeting this tumor-initiating population and the  
323 findings presented herein could lead to more efficacious clinical use of agents like bortezomib,  
324 particularly in targeting the leukemic stem cells<sup>58,59</sup>. Overall, we have identified *Fbxo9* as a  
325 tumor suppressor of AML and shown that loss of its expression leads to increased proteasome  
326 activity and sensitivity to proteasome inhibition, thus implying that *FBXO9* expression could be  
327 used as an indicator for patients who would respond well to proteasome inhibition.

328

## 329 **METHODS**

### 330 **Transgenic mouse models.**

331 *Fbxo9* cKO mice were developed using Easi-CRISPR as previously published<sup>29</sup> and bred with  
332 *Cbfb*<sup>+56M</sup> [<sup>29,32</sup>] or *Mx*<sup>cre</sup> mice purchased from Jackson Laboratories (#003556, Bar Harbor, ME,  
333 USA). PCR confirmed genotype and expression (primers in supplemental materials and  
334 methods). To induce cKO of *Fbxo9* and expression of *Cbfb-MYH11*, 6-8 week-old floxed mice  
335 and littermate controls received three intraperitoneal Poly(I:C) injections every other day at a  
336 dose of 10µg per gram body weight (Invivogen). Procedures performed were approved by the

337 Institutional Animal Care and Use Committee of the University of Nebraska Medical Center in  
338 accordance with NIH guidelines.

339

#### 340 **Flow Cytometry analysis**

341 For flow cytometry analyses, PB was extracted from the tail vein and RBCs were lysed with  
342 500 $\mu$ L ACK lysing buffer. Upon sacrifice, spleen and BM cells were strained through 0.45 $\mu$ m  
343 strainer and treated with ACK lysing buffer. Spleen, BM, and PB cells were stained for 1h on ice  
344 in the dark in 3% FBS in PBS (antibodies in supplemental materials and methods). For cell  
345 cycle analysis, cells were fixed and permeabilized following Biolegend intracellular staining  
346 protocol and stained with Ki67 and DAPI using 1 $\mu$ L DAPI per sample.

347

#### 348 **Colony Forming Cell (CFC) Assay**

349 Fresh or culture progeny from total BM were counted and 5000 cells/well of a 24-well plate were  
350 resuspended in Methocult (M3434, Stem Cell Technologies, Vancouver, BC, Canada). Colonies  
351 were counted at day 7, resuspended, and replated as before.

352

#### 353 **Histological Staining**

354 Mouse organs were fixed in 10% (vol/vol) buffered formalin phosphate for 24h and stored in  
355 70% ethanol. Sections were stained with H&E using standard protocols. The slides were  
356 evaluated and graded by treatment group by a pathologist for leukemia infiltration.

357

#### 358 **Western Blot Analysis**

359 For western blot analysis, samples were lysed in an IP lysis buffer (20mM Tris pH7.5, 150mM  
360 NaCl, 1mM EDTA) containing 1X Halt Protease and Phosphatase Inhibitor Cocktail  
361 (ThermoFisher, Waltham, MA, USA) and 10mM NEM. Membranes were blocked in 5% milk.  
362 Antibodies were prepared in 5% BSA as indicated in supplemental materials and methods.

363 Horse Radish Peroxidase conjugated secondary antibodies (Jackson Laboratory) were  
364 prepared in 5% milk as indicated in supplemental materials and methods.

365

#### 366 **RNA extraction and quantitative RT-PCR**

367 Total RNA was harvested from BM cells using the RNeasy Kit (QIAGEN, Hilden, Germany).  
368 Following extraction, total RNA was used for cDNA synthesis using the High Capacity RNA-to-  
369 cDNA Kit (ThermoFisher). cDNA was quantified by measuring absorbance at A280nm and qRT-  
370 PCR was carried out on equal concentrations of cDNA from each sample using the iTaq  
371 Universal SYBR Green Supermix (BioRad, Hercules, CA, USA). Primers in supplemental  
372 materials and methods.

373

#### 374 **TMT labeling and Mass Spectrometry**

375 For global proteome quantification, splenic tumor cells were isolated as described above from 2-  
376 3 mice per genotype. Samples were prepared and TMT-labeled per manufacturer's protocol  
377 (ThermoFisher TMT10plex Mass Tag Labeling Kits). Following TMT labeling, acetonitrile was  
378 removed by speedvac and samples were resuspended in 0.1% trifluoroacetic acid. Sample  
379 cleanup with C18 tips was performed per manufacturer's protocol (Pierce). Sample  
380 concentrations were re-quantified (Pierce Quantitative Colorimetric Peptide Assay kit) and  
381 combined in equal concentration. Following combination, samples were dried by speedvac and  
382 fractionated by ThermoFisher high pH reverse phase fractionation kit following manufacturer's  
383 protocol for TMT. Resulting fractions were dried in a speedvac and resuspended in 0.1% Formic  
384 Acid for MS analysis (see supplemental methods). Data are available via ProteomeXchange  
385 with identifier PXD014387<sup>60</sup>.

386

#### 387 **Proteasome Activity Assay**

388 Tumor cells from isolated spleen tissue ( $2 \times 10^6$ ) were lysed in 0.5% NP-40 in PBS for 10min on  
389 ice with vortexing. 5-10  $\mu$ g protein lysates were cultured and proteasome activity measured  
390 using the 20S Proteasome Activity Assay kit (APT280, Millipore, Billerica, MA, USA) per  
391 manufacturer's protocol.

392

### 393 **MTT Assay**

394  $2 \times 10^5$  cells were plated into each well of a 96-well plate and cultured for 24h in 100 $\mu$ L tumor  
395 growth medium (StemSpan SFEM, 5% Penn/Strep, 5% Lipid mixture, 5% Glutamate, 20ng/mL  
396 SCF, 10ng/mL IL-6, 10ng/mL IL-3) containing DMSO or varying concentrations of bortezomib.  
397 Following culture, CellTiter 96 AQueous One Solution Cell Proliferation Assay (MTS) (Promega,  
398 Madison, WI, USA) was performed per manufacturer's protocol.

399

### 400 **Statistical analysis**

401 All experiments were performed in triplicate unless noted and statistical analyses were  
402 performed using unpaired two-tailed Student's t-test assuming experimental samples of equal  
403 variance. \* p-value<0.05, \*\* p-value<0.01, \*\*\* p-value<0.001, \*\*\*\* p-value<0.0001.

404

### 405 **AUTHOR CONTRIBUTIONS**

406 R.W.H., and S.M.B. conceived and designed the experiments. R.W.H., K.J.W., M.C., S.A.S.,  
407 H.V., and S.M.B. performed experiments and analysis. R.W.H., and S.M.B. wrote the  
408 manuscript. R.K.H. provided technical and material support. C.A. provided hematopathology  
409 expertise. All authors reviewed the manuscript before submission.

410

### 411 **ACKNOWLEDGEMENTS**

412 We would like to thank the UNMC Flow Cytometry Research Facility, UNMC Mouse Genome  
413 Engineering Core Facility, and UNMC Mass Spectrometry and Proteomics Core Facility for



414 expert assistance. The core facilities are administrated through the Office of the Vice Chancellor  
415 for Research and supported by state funds from the Nebraska Research Initiative (NRI) and The  
416 Fred and Pamela Buffett Cancer Center's National Cancer Institute Cancer Support Grant.  
417 S.M.B. is supported by the National Institutes of Health (P20GM121316), and ACS institutional  
418 grant. R.K.H., and S.M.B are supported by the UNMC Pediatric Cancer Group and by National  
419 Institute of General Medical Sciences of the National Institutes of Health under grant number  
420 p30GM106397. R.W.H. is supported by the UNMC NIH training grant (5T32CA009476-23). This  
421 publication was supported by the Fred & Pamela Buffett Cancer Center Support Grant from the  
422 National Cancer Institute under award number P30 CA036727.

423

#### 424 **DISCLOSURES OF CONFLICTS OF INTEREST**

425 The authors have no conflicts of interest related to this work.

426

427

428 **FIGURE LEGENDS**

429 **Figure 1 *Fbxo9* expression is reduced in AML patients and correlates with poor survival.**

430 A Of all F-box family proteins, *FBXO9* has the lowest expression in AML subtypes. B-C Analysis  
431 of patient samples from the B adult MILE and C pediatric TARGET studies reveals that AML  
432 patients have low *FBXO9* expression across a variety of subtypes when compared to healthy  
433 BM. D-E Poor survival correlates with low *FBXO9* expression in both D adults and E children (\*  
434  $p < 0.05$ , \*\*  $p < 0.01$ , \*\*\*  $p < 0.001$ , \*\*\*\*  $p < 0.0001$ ).

435

436 **Figure 2 Generation of conditional *Fbxo9* knockout mouse model.** A Using the Easi-  
437 CRISPR method, LoxP sites were introduced into the introns flanking *Fbxo9* exon 4. B  
438 Genotyping PCR demonstrates the introduction of LoxP sites and presence of *Cbfb*<sup>+56M</sup>  
439 transgenic allele and shows the loss of exon 4 and expression of the *Cbfb-MYH11* fusion gene  
440 following injections with Poly(I:C). C *Fbxo9* exon 4 cKO confirmed by qRT-PCR analysis while  
441 exons 2-3 remain undisturbed (\*\*\*\*  $p < 0.0001$ ).

442

443 **Figure 3 Loss of *Fbxo9* alters murine HSPC function.** A Analysis of *Fbxo9* expression in WT  
444 murine hematopoietic lineages shows high expression in the long-term stem cells (LT-HSCs;  
445 Lin<sup>-</sup>cKit<sup>+</sup>Sca-1<sup>+</sup>CD150<sup>+</sup>CD48<sup>-</sup>), short-term stem cells (ST-HSCs; Lin<sup>-</sup>cKit<sup>+</sup>Sca-1<sup>+</sup>CD150<sup>-</sup>CD48<sup>-</sup>),  
446 megakaryocyte-erythroid progenitors (MEPs; Lin<sup>-</sup>cKit<sup>+</sup>Sca-1<sup>-</sup>CD34<sup>-</sup>CD16/32<sup>-</sup>), and macrophages  
447 (CD11b<sup>+</sup>Gr1<sup>-</sup>) when compared to total BM. B Bar graph of cell counts from BM extracted from  
448 the right femur of sacrificed mice. C-F Bar graphs showing the cell count of Lin<sup>-</sup>, cKit<sup>+</sup> (Lin<sup>-</sup>  
449 cKit<sup>+</sup>Sca-1<sup>-</sup>), LSKs (Lin<sup>-</sup>cKit<sup>+</sup>Sca-1<sup>+</sup>), LT-HSC, ST-HSC, multipotent progenitors (MPP; Lin<sup>-</sup>  
450 cKit<sup>+</sup>Sca-1<sup>+</sup>CD150<sup>-</sup>CD48<sup>+</sup>), MPP2 (Lin<sup>-</sup>cKit<sup>+</sup>Sca-1<sup>+</sup>CD150<sup>+</sup>CD48<sup>+</sup>), granulocyte-macrophage  
451 progenitors (GMP; Lin<sup>-</sup>cKit<sup>+</sup>Sca-1<sup>-</sup>CD34<sup>+</sup>CD16/32<sup>hi</sup>), common myeloid progenitor (CMP; Lin<sup>-</sup>  
452 cKit<sup>+</sup>Sca-1<sup>-</sup>CD34<sup>+</sup>CD16/32<sup>lo</sup>), and MEP compartments in the BM of mice of the indicated  
453 genotypes. G Bar graph of colonies per 10000 cells plated in methyl cellulose. H Bar graph

454 showing the percentages of cells in  $G_0$  and  $G_1$  (for all data shown, bar graphs are mean  $\pm$   
455 standard deviation,  $n = 3$ , \*  $p < 0.05$ , \*\*  $p < 0.01$ ).

456

457 **Figure 4 Loss of *Fbxo9* accelerates *inv(16)* AML and causes a more aggressive disease**

458 **phenotype.** A Analysis of the PB of mice following initiation of *inv(16)* AML shows that the cKit<sup>+</sup>

459 tumor population expands more rapidly in *Fbxo9* KO mice (mean  $\pm$  standard deviation). B

460 Kaplan-Meier survival curves of Poly(I:C) treated mice shows that loss of *Fbxo9* reduced time of

461 survival ( $n = 8$ ). C-D Bar graphs (mean  $\pm$  standard deviation) representing the percentage of C

462 cKit<sup>+</sup> tumor cells or D Gr1<sup>+</sup>/CD11b<sup>+</sup> cells in the BM of mice at time of sacrifice. E Representative

463 images of Wright-Giemsa-stained peripheral blood and hematoxylin-eosin (H&E)-stained spleen

464 and liver sections of mice with the indicated genotypes at time of sacrifice. Bars, 20  $\mu$ m. F-G

465 Quantification of the infiltration in the F spleen and G liver where red represents 100% infiltration

466 and complete effacement, while blue represents no infiltration with normal tissue architecture ( $n$

467 = 7) (\*  $p < 0.05$ , \*\*  $p < 0.01$ ).

468

469 **Figure 5 Transplant of *inv(16)* spleen tumor cells with lower expression of *Fbxo9* develop**

470 **more aggressively.** A FACS plots of spleen tumor cells transplanted into sub-lethally irradiated

471 host mice. B Bar graph (mean  $\pm$  standard deviation) representing the percentage of cKit<sup>+</sup> cells

472 in the PB of transplant mice. C Overall survival of mice transplanted with tumors of the indicated

473 genotypes ( $n = 10$ , \*  $p < 0.05$ , \*\*  $p < 0.01$ , \*\*\*  $p < 0.001$ ).

474

475 **Figure 6 Tumors lacking *Fbxo9* are more similar than tumors with WT expression.** A

476 Schematic of preparation for TMT MS using tumors isolated from *Cbfb*<sup>+56M</sup>*Fbxo9*<sup>+/+</sup>,

477 *Cbfb*<sup>+56M</sup>*Fbxo9*<sup>+/-</sup>, and *Cbfb*<sup>+56M</sup>*Fbxo9*<sup>-/-</sup> mice ( $n = 3$ ). B Quantification of the identified peptides

478 and proteins. C Volcano plot of the fold change *Cbfb*<sup>+56M</sup>*Fbxo9*<sup>-/-</sup>/*Cbfb*<sup>+56M</sup>*Fbxo9*<sup>+/+</sup> samples for

479 significantly up-regulated and significantly down-regulated proteins (pink, significantly

480 upregulated in *Cbfb*<sup>+56M</sup>*Fbxo9*<sup>+/-</sup>/*Cbfb*<sup>+56M</sup>*Fbxo9*<sup>+/+</sup>; yellow, proteins participating in proteasome-  
481 dependent pathway; green, top up-regulated proteins associated with tumorigenicity). D Pie  
482 chart of localizations for the differentially expressed proteins identified in either the  
483 *Cbfb*<sup>+56M</sup>*Fbxo9*<sup>+/-</sup>, *Cbfb*<sup>+56M</sup>*Fbxo9*<sup>-/-</sup>, or both cohorts. E PCA plot using components 1 and 2  
484 showing clustering of *Cbfb*<sup>+56M</sup>*Fbxo9*<sup>+/+</sup> tumors compared to *Cbfb*<sup>+56M</sup>*Fbxo9*<sup>+/-</sup> and  
485 *Cbfb*<sup>+56M</sup>*Fbxo9*<sup>-/-</sup> tumors. F Heatmap with hierarchical clustering of the significantly up-regulated  
486 ( $p < 0.05$ ,  $\geq 1.3$  fold increase over WT) and down-regulated ( $p < 0.05$ ,  $\leq 0.7$  fold decrease from  
487 WT).

488

489 **Figure 7 Knockout of *Fbxo9* results in an increase in proteasome activity and differing**  
490 **response to proteasome inhibition *in vitro*.** A Gene ontology analysis showing pathways  
491 known to be associated with significantly up-regulated ( $p < 0.05$ ,  $\geq 1.3$  fold change) proteins  
492 using DAVID 6.8 software. For up-regulated proteins, pathways included have  $\geq 10$  associated  
493 proteins and  $p < 0.01$ . B Western Blot analysis of identified up-regulated proteins and  
494 proteasome components for expression in murine inv(16) AML tumors with the indicated  
495 genotypes. C Bar graph (mean  $\pm$  standard deviation) quantifying relative expression of the  
496 proteins compared to  $\beta$ -actin expression. D Bar graph (mean  $\pm$  standard deviation) of  
497 proteasome activity in cultured tumor cells using the indicated amounts of protein, proteasome  
498 activity confirmed by treatment with the proteasome inhibitor lactacystin. E Bar graph (mean  $\pm$   
499 standard deviation) showing survival of *Cbfb*<sup>+56M</sup>*Fbxo9*<sup>+/+</sup> and *Cbfb*<sup>+56M</sup>*Fbxo9*<sup>-/-</sup> tumor cells after  
500 24 h culture with increasing doses of bortezomib. F Bar graph (mean  $\pm$  standard deviation)  
501 quantifying cell death of tumors cultured 16 h with 20 nM bortezomib, cell death analyzed by  
502 flow cytometry using Annexin-V and 7AAD (for all data shown  $n = 3$ , \*  $p < 0.05$ , \*\*  $p < 0.01$ ).

503

504

505 **REFERENCES**

- 506 1 Ferrara, F. & Schiffer, C. A. Acute myeloid leukaemia in adults. *Lancet* **381**, 484-495,  
507 doi:10.1016/S0140-6736(12)61727-9 (2013).
- 508 2 Noone AM, H. N., Krapcho M, Miller D, Brest A, Yu M, Ruhl J, Tatalovich Z, Mariotto A,  
509 Lewis DR, Chen HS, Feuer EJ, Cronin KA (eds.).
- 510 3 Castaigne, S. *et al.* Effect of gemtuzumab ozogamicin on survival of adult patients with  
511 de-novo acute myeloid leukaemia (ALFA-0701): a randomised, open-label, phase 3  
512 study. *Lancet* **379**, 1508-1516, doi:10.1016/S0140-6736(12)60485-1 (2012).
- 513 4 Lancet, J. E. *et al.* Overall survival (OS) with CPX-351 versus 7+3 in older adults with  
514 newly diagnosed, therapy-related acute myeloid leukemia (tAML): Subgroup analysis of  
515 a phase III study. *Journal of Clinical Oncology* **35**, 7035-7035,  
516 doi:10.1200/JCO.2017.35.15\_suppl.7035 (2017).
- 517 5 Stein, E. M. *et al.* Enasidenib in mutant IDH2 relapsed or refractory acute myeloid  
518 leukemia. *Blood* **130**, 722-731, doi:10.1182/blood-2017-04-779405 (2017).
- 519 6 Stone, R. M. *et al.* Midostaurin plus Chemotherapy for Acute Myeloid Leukemia with a  
520 FLT3 Mutation. *N Engl J Med* **377**, 454-464, doi:10.1056/NEJMoa1614359 (2017).
- 521 7 Sadowski, M., Suryadinata, R., Tan, A. R., Roesley, S. N. & Sarcevic, B. Protein  
522 monoubiquitination and polyubiquitination generate structural diversity to control  
523 distinct biological processes. *IUBMB Life* **64**, 136-142, doi:10.1002/iub.589 (2012).
- 524 8 Pham, L. V., Tamayo, A. T., Yoshimura, L. C., Lo, P. & Ford, R. J. Inhibition of constitutive  
525 NF-kappa B activation in mantle cell lymphoma B cells leads to induction of cell cycle  
526 arrest and apoptosis. *J Immunol* **171**, 88-95 (2003).
- 527 9 Singhal, S. *et al.* Antitumor activity of thalidomide in refractory multiple myeloma. *N*  
528 *Engl J Med* **341**, 1565-1571, doi:10.1056/NEJM199911183412102 (1999).
- 529 10 Metzger, M. B., Hristova, V. A. & Weissman, A. M. HECT and RING finger families of E3  
530 ubiquitin ligases at a glance. *J Cell Sci* **125**, 531-537, doi:10.1242/jcs.091777 (2012).
- 531 11 Kipreos, E. T. & Pagano, M. The F-box protein family. *Genome Biol* **1**, REVIEWS3002,  
532 doi:10.1186/gb-2000-1-5-reviews3002 (2000).
- 533 12 Cenciarelli, C. *et al.* Identification of a family of human F-box proteins. *Curr Biol* **9**, 1177-  
534 1179, doi:10.1016/S0960-9822(00)80020-2 (1999).
- 535 13 Winston, J. T., Koepp, D. M., Zhu, C., Elledge, S. J. & Harper, J. W. A family of mammalian  
536 F-box proteins. *Curr Biol* **9**, 1180-1182, doi:10.1016/S0960-9822(00)80021-4 (1999).
- 537 14 Moran-Crusio, K., Reavie, L. B. & Aifantis, I. Regulation of hematopoietic stem cell fate  
538 by the ubiquitin proteasome system. *Trends Immunol* **33**, 357-363,  
539 doi:10.1016/j.it.2012.01.009 (2012).
- 540 15 Strikoudis, A., Guillaumot, M. & Aifantis, I. Regulation of stem cell function by protein  
541 ubiquitylation. *EMBO Rep* **15**, 365-382, doi:10.1002/embr.201338373 (2014).
- 542 16 Wang, Z., Liu, P., Inuzuka, H. & Wei, W. Roles of F-box proteins in cancer. *Nat Rev Cancer*  
543 **14**, 233-247, doi:10.1038/nrc3700 (2014).
- 544 17 Thompson, B. J. *et al.* The SCFFBW7 ubiquitin ligase complex as a tumor suppressor in T  
545 cell leukemia. *J Exp Med* **204**, 1825-1835, doi:10.1084/jem.20070872 (2007).

- 546 18 Thompson, B. J. *et al.* Control of hematopoietic stem cell quiescence by the E3 ubiquitin  
547 ligase Fbw7. *J Exp Med* **205**, 1395-1408, doi:10.1084/jem.20080277 (2008).
- 548 19 Reavie, L. *et al.* Regulation of c-Myc ubiquitination controls chronic myelogenous  
549 leukemia initiation and progression. *Cancer Cell* **23**, 362-375,  
550 doi:10.1016/j.ccr.2013.01.025 (2013).
- 551 20 Vaites, L. P. *et al.* The Fbx4 tumor suppressor regulates cyclin D1 accumulation and  
552 prevents neoplastic transformation. *Mol Cell Biol* **31**, 4513-4523,  
553 doi:10.1128/MCB.05733-11 (2011).
- 554 21 Chen, B. B. *et al.* F-box protein FBXL2 targets cyclin D2 for ubiquitination and  
555 degradation to inhibit leukemic cell proliferation. *Blood* **119**, 3132-3141,  
556 doi:10.1182/blood-2011-06-358911 (2012).
- 557 22 Ueda, T. *et al.* Fbxl10 overexpression in murine hematopoietic stem cells induces  
558 leukemia involving metabolic activation and upregulation of Nsg2. *Blood* **125**, 3437-  
559 3446, doi:10.1182/blood-2014-03-562694 (2015).
- 560 23 Wang, L. *et al.* Fbxw11 promotes the proliferation of lymphocytic leukemia cells through  
561 the concomitant activation of NF-kappaB and beta-catenin/TCF signaling pathways. *Cell*  
562 *Death Dis* **9**, 427, doi:10.1038/s41419-018-0440-1 (2018).
- 563 24 Chen, J. Y., Wang, M. C. & Hung, W. C. Bcr-Abl-induced tyrosine phosphorylation of Emi1  
564 to stabilize Skp2 protein via inhibition of ubiquitination in chronic myeloid leukemia  
565 cells. *J Cell Physiol* **226**, 407-413, doi:10.1002/jcp.22346 (2011).
- 566 25 Fernandez-Saiz, V. *et al.* SCFFbxo9 and CK2 direct the cellular response to growth factor  
567 withdrawal via Tel2/Tti1 degradation and promote survival in multiple myeloma. *Nat*  
568 *Cell Biol* **15**, 72-81, doi:10.1038/ncb2651 (2013).
- 569 26 Haferlach, T. *et al.* Clinical utility of microarray-based gene expression profiling in the  
570 diagnosis and subclassification of leukemia: report from the International Microarray  
571 Innovations in Leukemia Study Group. *J Clin Oncol* **28**, 2529-2537,  
572 doi:10.1200/JCO.2009.23.4732 (2010).
- 573 27 Farrar, J. E. *et al.* Genomic Profiling of Pediatric Acute Myeloid Leukemia Reveals a  
574 Changing Mutational Landscape from Disease Diagnosis to Relapse. *Cancer Res* **76**,  
575 2197-2205, doi:10.1158/0008-5472.CAN-15-1015 (2016).
- 576 28 Cancer Genome Atlas Research, N. *et al.* Genomic and epigenomic landscapes of adult  
577 de novo acute myeloid leukemia. *N Engl J Med* **368**, 2059-2074,  
578 doi:10.1056/NEJMoa1301689 (2013).
- 579 29 Quadros, R. M. *et al.* Easi-CRISPR: a robust method for one-step generation of mice  
580 carrying conditional and insertion alleles using long ssDNA donors and CRISPR  
581 ribonucleoproteins. *Genome Biol* **18**, 92, doi:10.1186/s13059-017-1220-4 (2017).
- 582 30 Kuhn, R., Schwenk, F., Aguet, M. & Rajewsky, K. Inducible gene targeting in mice. *Science*  
583 **269**, 1427-1429 (1995).
- 584 31 Liu, P. *et al.* Fusion between transcription factor CBF beta/PEBP2 beta and a myosin  
585 heavy chain in acute myeloid leukemia. *Science* **261**, 1041-1044,  
586 doi:10.1126/science.8351518 (1993).
- 587 32 Kuo, Y. H. *et al.* Cbf beta-SMMHC induces distinct abnormal myeloid progenitors able to  
588 develop acute myeloid leukemia. *Cancer Cell* **9**, 57-68, doi:10.1016/j.ccr.2005.12.014  
589 (2006).

- 590 33 Hyde, R. K. *et al.* Cbfb/Runx1 repression-independent blockage of differentiation and  
591 accumulation of Csf2rb-expressing cells by Cbfb-MYH11. *Blood* **115**, 1433-1443,  
592 doi:10.1182/blood-2009-06-227413 (2010).
- 593 34 Aleskandarany, M. A. *et al.* TOMM34 expression in early invasive breast cancer: a  
594 biomarker associated with poor outcome. *Breast Cancer Res Treat* **136**, 419-427,  
595 doi:10.1007/s10549-012-2249-4 (2012).
- 596 35 Boulay, P. L. *et al.* ARF1 controls proliferation of breast cancer cells by regulating the  
597 retinoblastoma protein. *Oncogene* **30**, 3846-3861, doi:10.1038/onc.2011.100 (2011).
- 598 36 de Groot, M. *et al.* Overexpression of ADK in human astrocytic tumors and peritumoral  
599 tissue is related to tumor-associated epilepsy. *Epilepsia* **53**, 58-66, doi:10.1111/j.1528-  
600 1167.2011.03306.x (2012).
- 601 37 Kim, N. H. *et al.* Snail reprograms glucose metabolism by repressing  
602 phosphofructokinase PFKP allowing cancer cell survival under metabolic stress. *Nat*  
603 *Commun* **8**, 14374, doi:10.1038/ncomms14374 (2017).
- 604 38 Lin, Y. N. *et al.* Expression of DIAPH1 is up-regulated in colorectal cancer and its down-  
605 regulation strongly reduces the metastatic capacity of colon carcinoma cells. *Int J Cancer*  
606 **134**, 1571-1582, doi:10.1002/ijc.28486 (2014).
- 607 39 Yuan, B. *et al.* WDR1 Promotes Cell Growth and Migration and Contributes to Malignant  
608 Phenotypes of Non-small Cell Lung Cancer through ADF/cofilin-mediated Actin  
609 Dynamics. *Int J Biol Sci* **14**, 1067-1080, doi:10.7150/ijbs.23845 (2018).
- 610 40 Chen, D. & Dou, Q. P. The ubiquitin-proteasome system as a prospective molecular  
611 target for cancer treatment and prevention. *Curr Protein Pept Sci* **11**, 459-470 (2010).
- 612 41 Betz, B. L. & Hess, J. L. Acute myeloid leukemia diagnosis in the 21st century. *Arch Pathol*  
613 *Lab Med* **134**, 1427-1433, doi:10.1043/2010-0245-RA.1 (2010).
- 614 42 George, J. *et al.* Leukaemia cell of origin identified by chromatin landscape of bulk  
615 tumour cells. *Nat Commun* **7**, 12166, doi:10.1038/ncomms12166 (2016).
- 616 43 Arlt, A. *et al.* Increased proteasome subunit protein expression and proteasome activity  
617 in colon cancer relate to an enhanced activation of nuclear factor E2-related factor 2  
618 (Nrf2). *Oncogene* **28**, 3983-3996, doi:10.1038/onc.2009.264 (2009).
- 619 44 Chen, L. & Madura, K. Increased proteasome activity, ubiquitin-conjugating enzymes,  
620 and eEF1A translation factor detected in breast cancer tissue. *Cancer Res* **65**, 5599-5606,  
621 doi:10.1158/0008-5472.CAN-05-0201 (2005).
- 622 45 Stoebner, P. E. *et al.* High plasma proteasome levels are detected in patients with  
623 metastatic malignant melanoma. *Br J Dermatol* **152**, 948-953, doi:10.1111/j.1365-  
624 2133.2005.06487.x (2005).
- 625 46 Tsvetkov, P. *et al.* Oncogenic addiction to high 26S proteasome level. *Cell Death Dis* **9**,  
626 773, doi:10.1038/s41419-018-0806-4 (2018).
- 627 47 Ma, W. *et al.* Ubiquitin-proteasome system profiling in acute leukemias and its clinical  
628 relevance. *Leuk Res* **35**, 526-533, doi:10.1016/j.leukres.2010.09.009 (2011).
- 629 48 Fowler, N. *et al.* Bortezomib, bendamustine, and rituximab in patients with relapsed or  
630 refractory follicular lymphoma: the phase II VERTICAL study. *J Clin Oncol* **29**, 3389-3395,  
631 doi:10.1200/JCO.2010.32.1844 (2011).
- 632 49 Moreau, P. *et al.* Proteasome inhibitors in multiple myeloma: 10 years later. *Blood* **120**,  
633 947-959, doi:10.1182/blood-2012-04-403733 (2012).

- 634 50 Robak, T. *et al.* Bortezomib-based therapy for newly diagnosed mantle-cell lymphoma. *N*  
635 *Engl J Med* **372**, 944-953, doi:10.1056/NEJMoa1412096 (2015).
- 636 51 Sarlo, C. *et al.* Phase II Study of Bortezomib as a Single Agent in Patients with Previously  
637 Untreated or Relapsed/Refractory Acute Myeloid Leukemia Ineligible for Intensive  
638 Therapy. *Leuk Res Treatment* **2013**, 705714, doi:10.1155/2013/705714 (2013).
- 639 52 Attar, E. C. *et al.* Bortezomib added to daunorubicin and cytarabine during induction  
640 therapy and to intermediate-dose cytarabine for consolidation in patients with  
641 previously untreated acute myeloid leukemia age 60 to 75 years: CALGB (Alliance) study  
642 10502. *J Clin Oncol* **31**, 923-929, doi:10.1200/JCO.2012.45.2177 (2013).
- 643 53 Blum, W. *et al.* Clinical and pharmacodynamic activity of bortezomib and decitabine in  
644 acute myeloid leukemia. *Blood* **119**, 6025-6031, doi:10.1182/blood-2012-03-413898  
645 (2012).
- 646 54 Horton, T. M. *et al.* A Phase 2 study of bortezomib combined with either  
647 idarubicin/cytarabine or cytarabine/etoposide in children with relapsed, refractory or  
648 secondary acute myeloid leukemia: a report from the Children's Oncology Group.  
649 *Pediatr Blood Cancer* **61**, 1754-1760, doi:10.1002/pbc.25117 (2014).
- 650 55 Walker, A. R. *et al.* Midostaurin, bortezomib and MEC in relapsed/refractory acute  
651 myeloid leukemia. *Leuk Lymphoma* **57**, 2100-2108,  
652 doi:10.3109/10428194.2015.1135435 (2016).
- 653 56 Warlick, E. D., Cao, Q. & Miller, J. Bortezomib and vorinostat in refractory acute  
654 myelogenous leukemia and high-risk myelodysplastic syndromes: produces stable  
655 disease but at the cost of high toxicity. *Leukemia* **27**, 1789-1791,  
656 doi:10.1038/leu.2013.61 (2013).
- 657 57 Orlowski, R. Z. *et al.* Phase 1 trial of the proteasome inhibitor bortezomib and pegylated  
658 liposomal doxorubicin in patients with advanced hematologic malignancies. *Blood* **105**,  
659 3058-3065, doi:10.1182/blood-2004-07-2911 (2005).
- 660 58 Guzman, M. L. *et al.* Preferential induction of apoptosis for primary human leukemic  
661 stem cells. *Proc Natl Acad Sci U S A* **99**, 16220-16225, doi:10.1073/pnas.252462599  
662 (2002).
- 663 59 Kagoya, Y. *et al.* Positive feedback between NF-kappaB and TNF-alpha promotes  
664 leukemia-initiating cell capacity. *J Clin Invest* **124**, 528-542, doi:10.1172/JCI68101 (2014).
- 665 60 Deutsch, E. W. *et al.* The ProteomeXchange consortium in 2017: supporting the cultural  
666 change in proteomics public data deposition. *Nucleic Acids Res* **45**, D1100-D1106,  
667 doi:10.1093/nar/gkw936 (2017).  
668



## Hynes-Smith et al. Figure 1

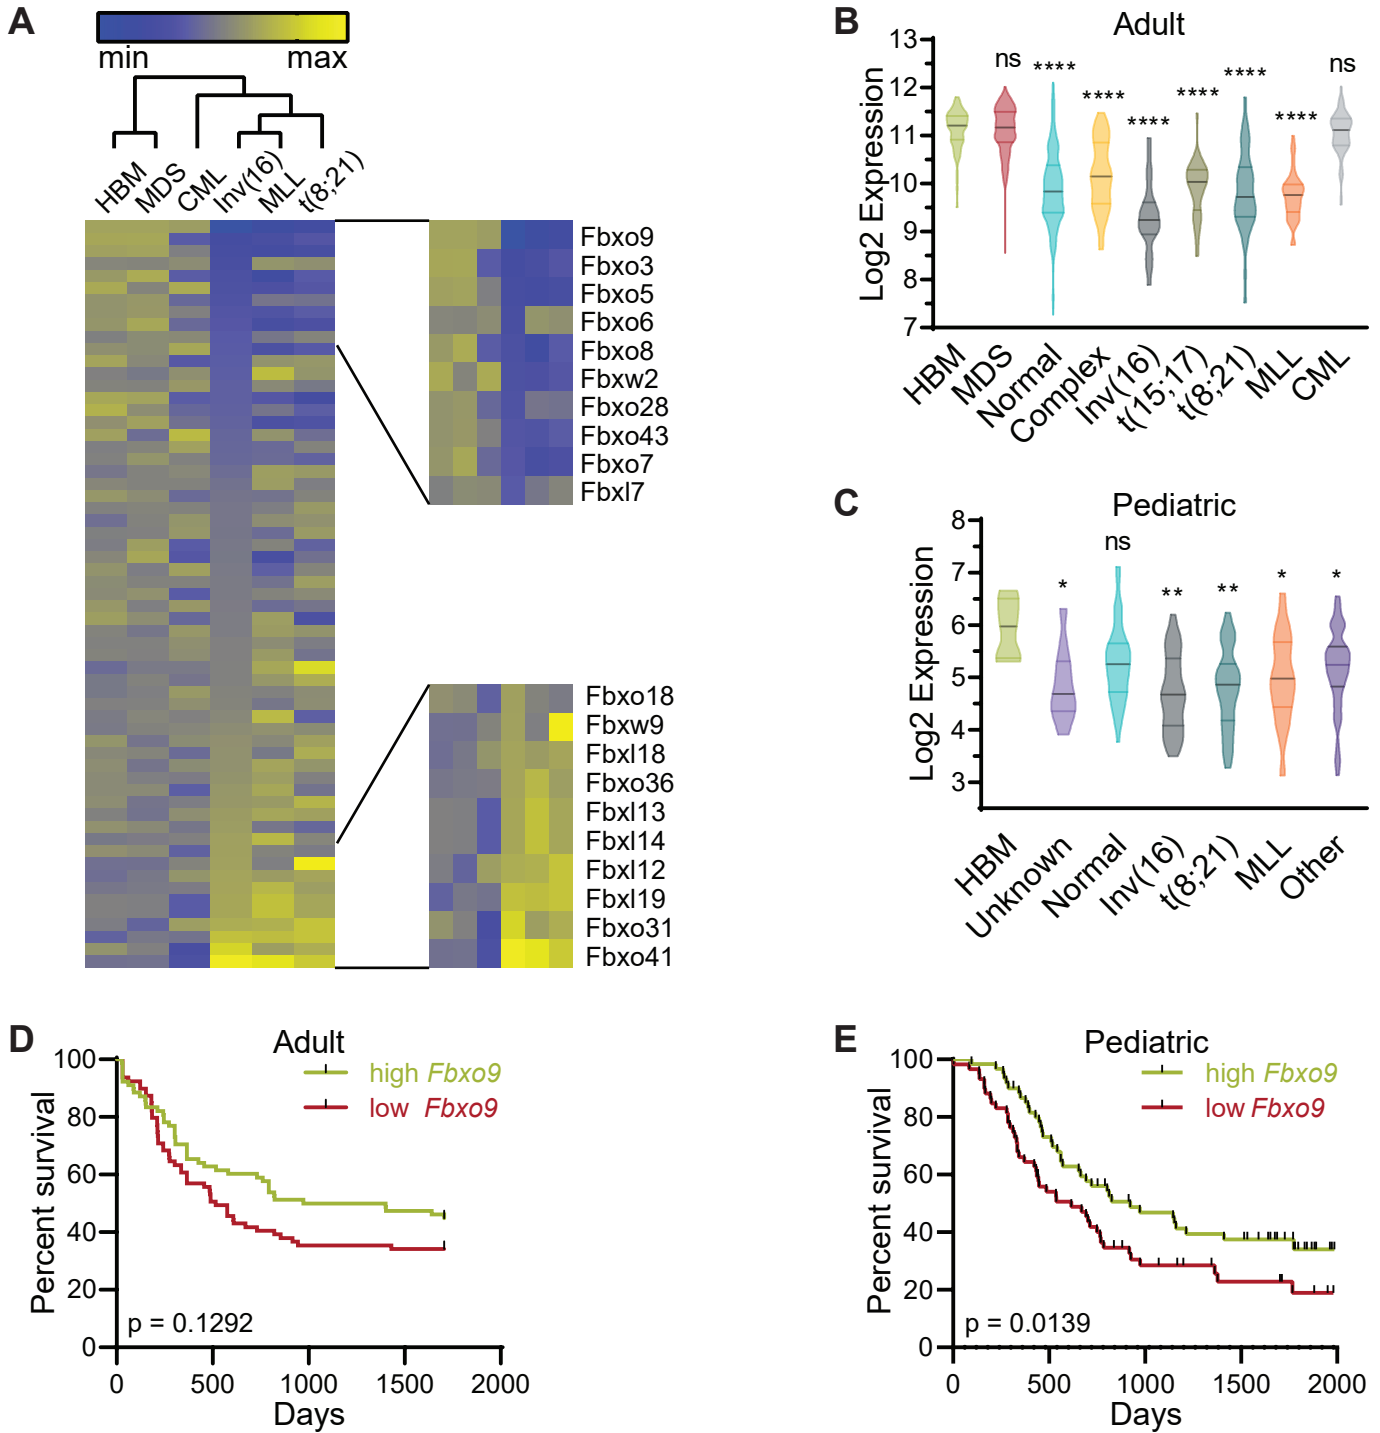

## Hynes-Smith et al. Figure 2

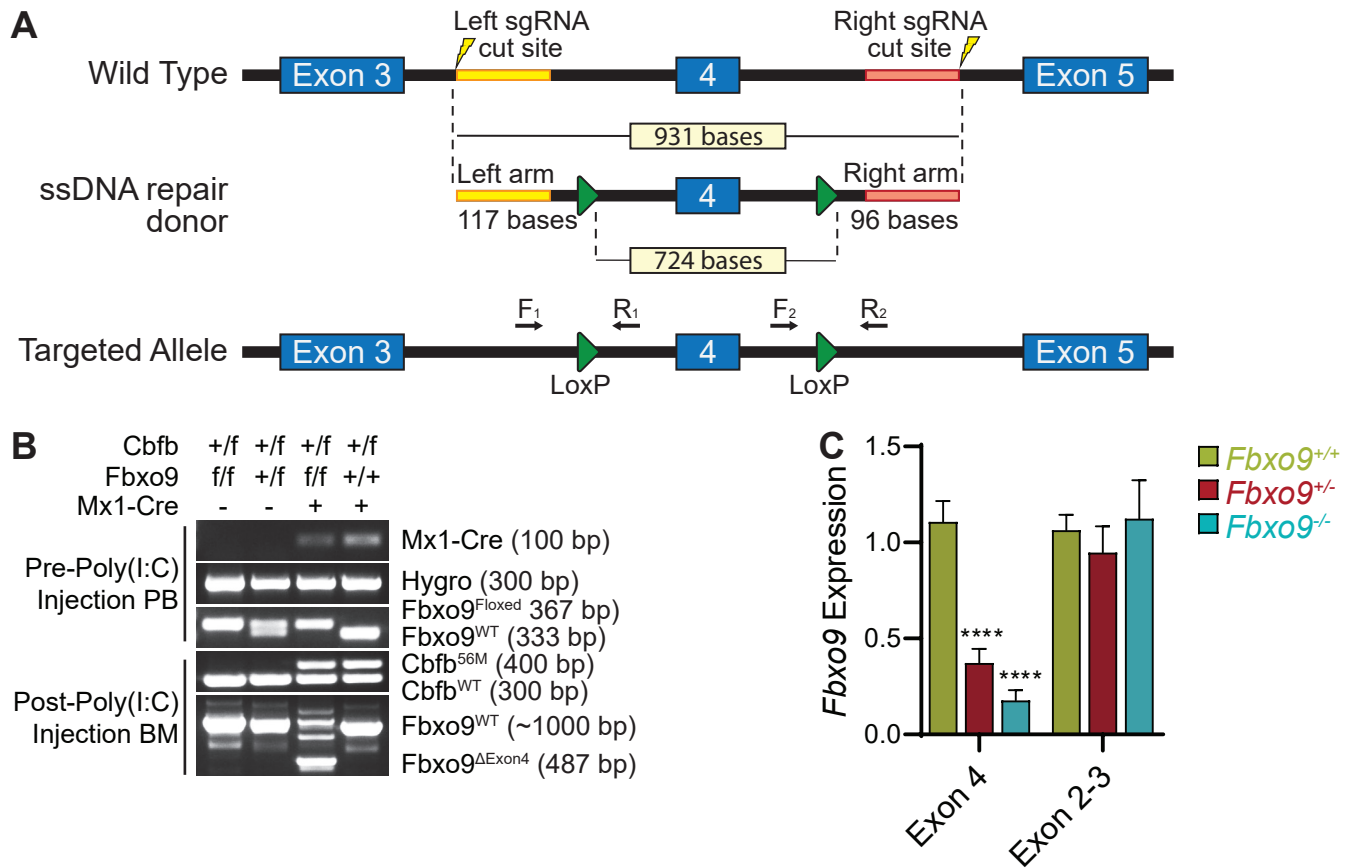

## Hynes-Smith et al. Figure 3

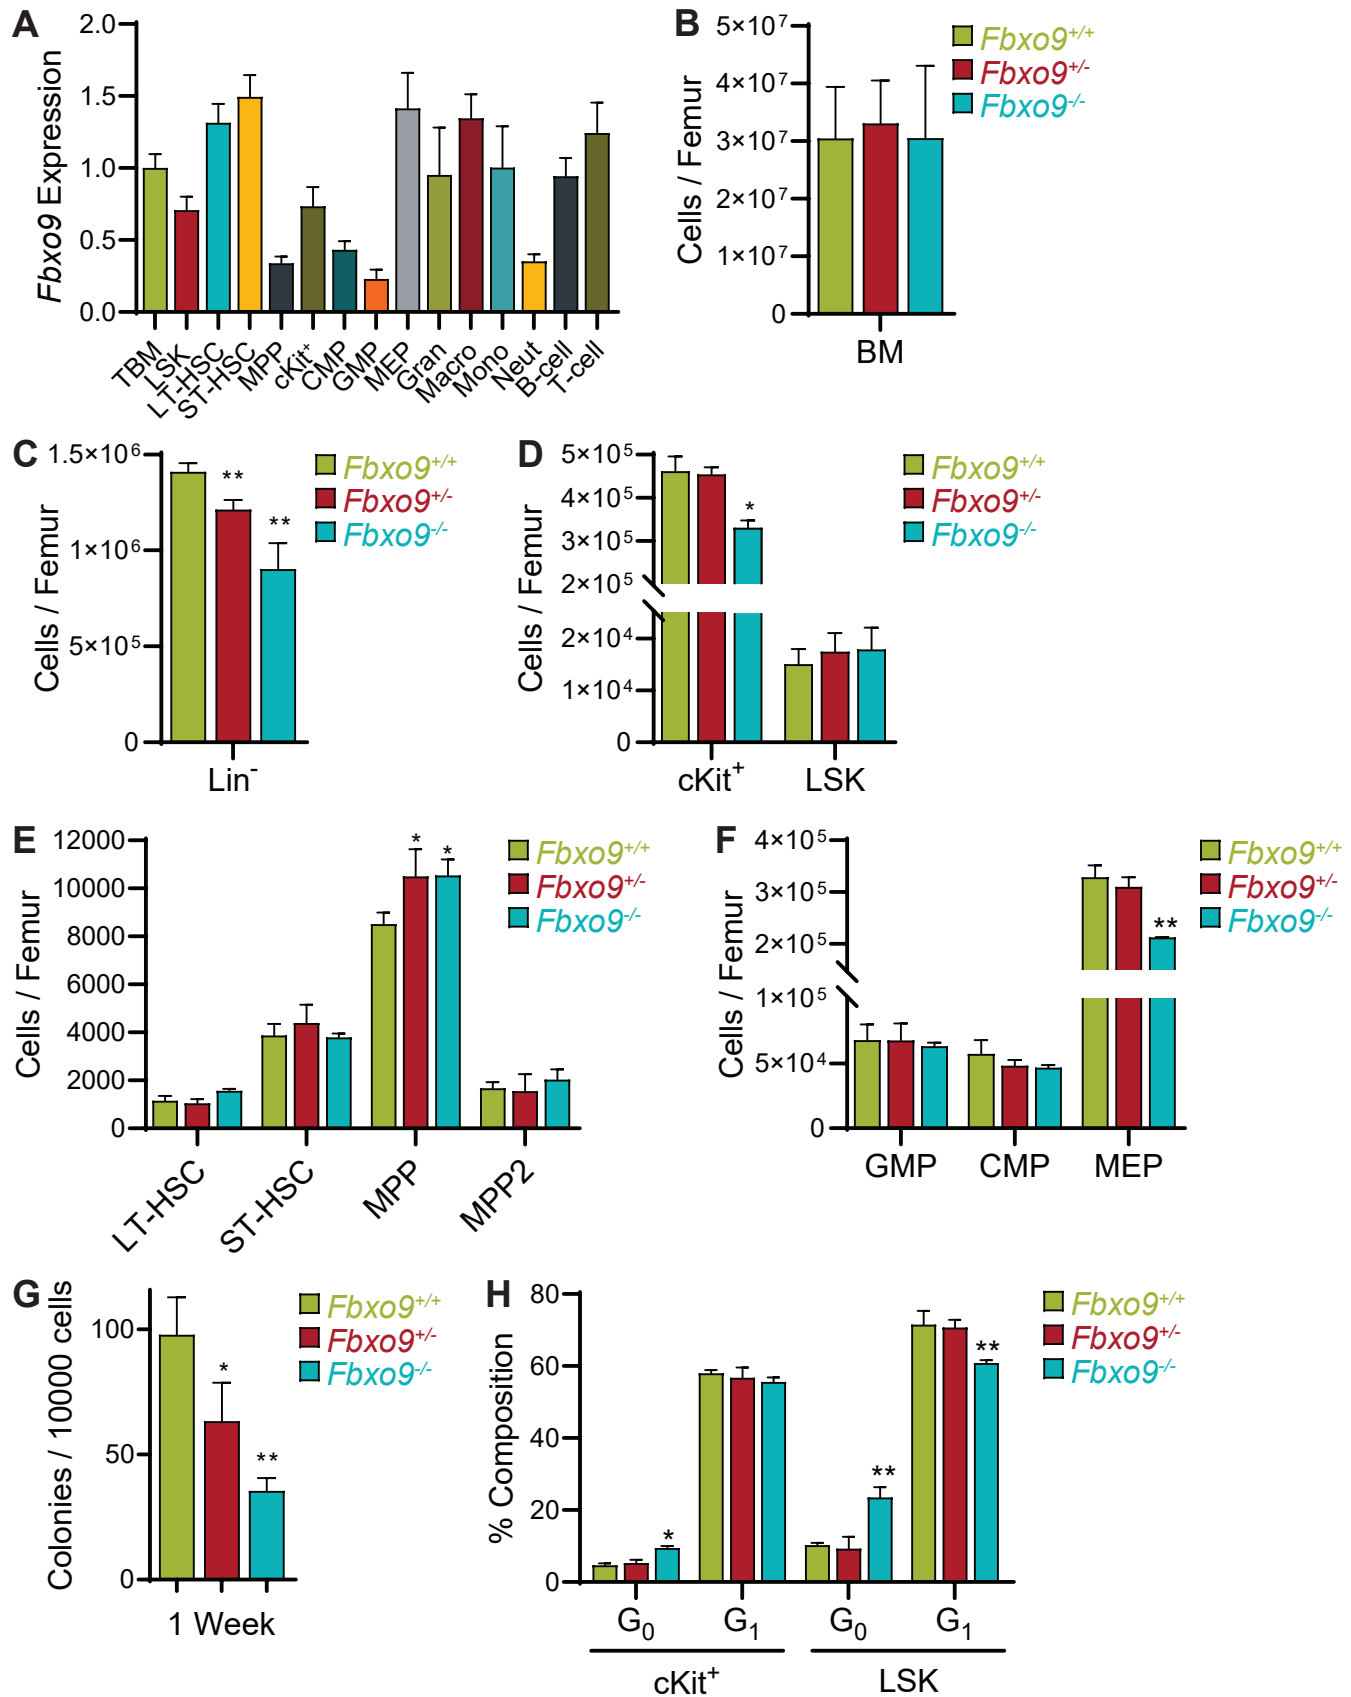

## Hynes et al Figure 4

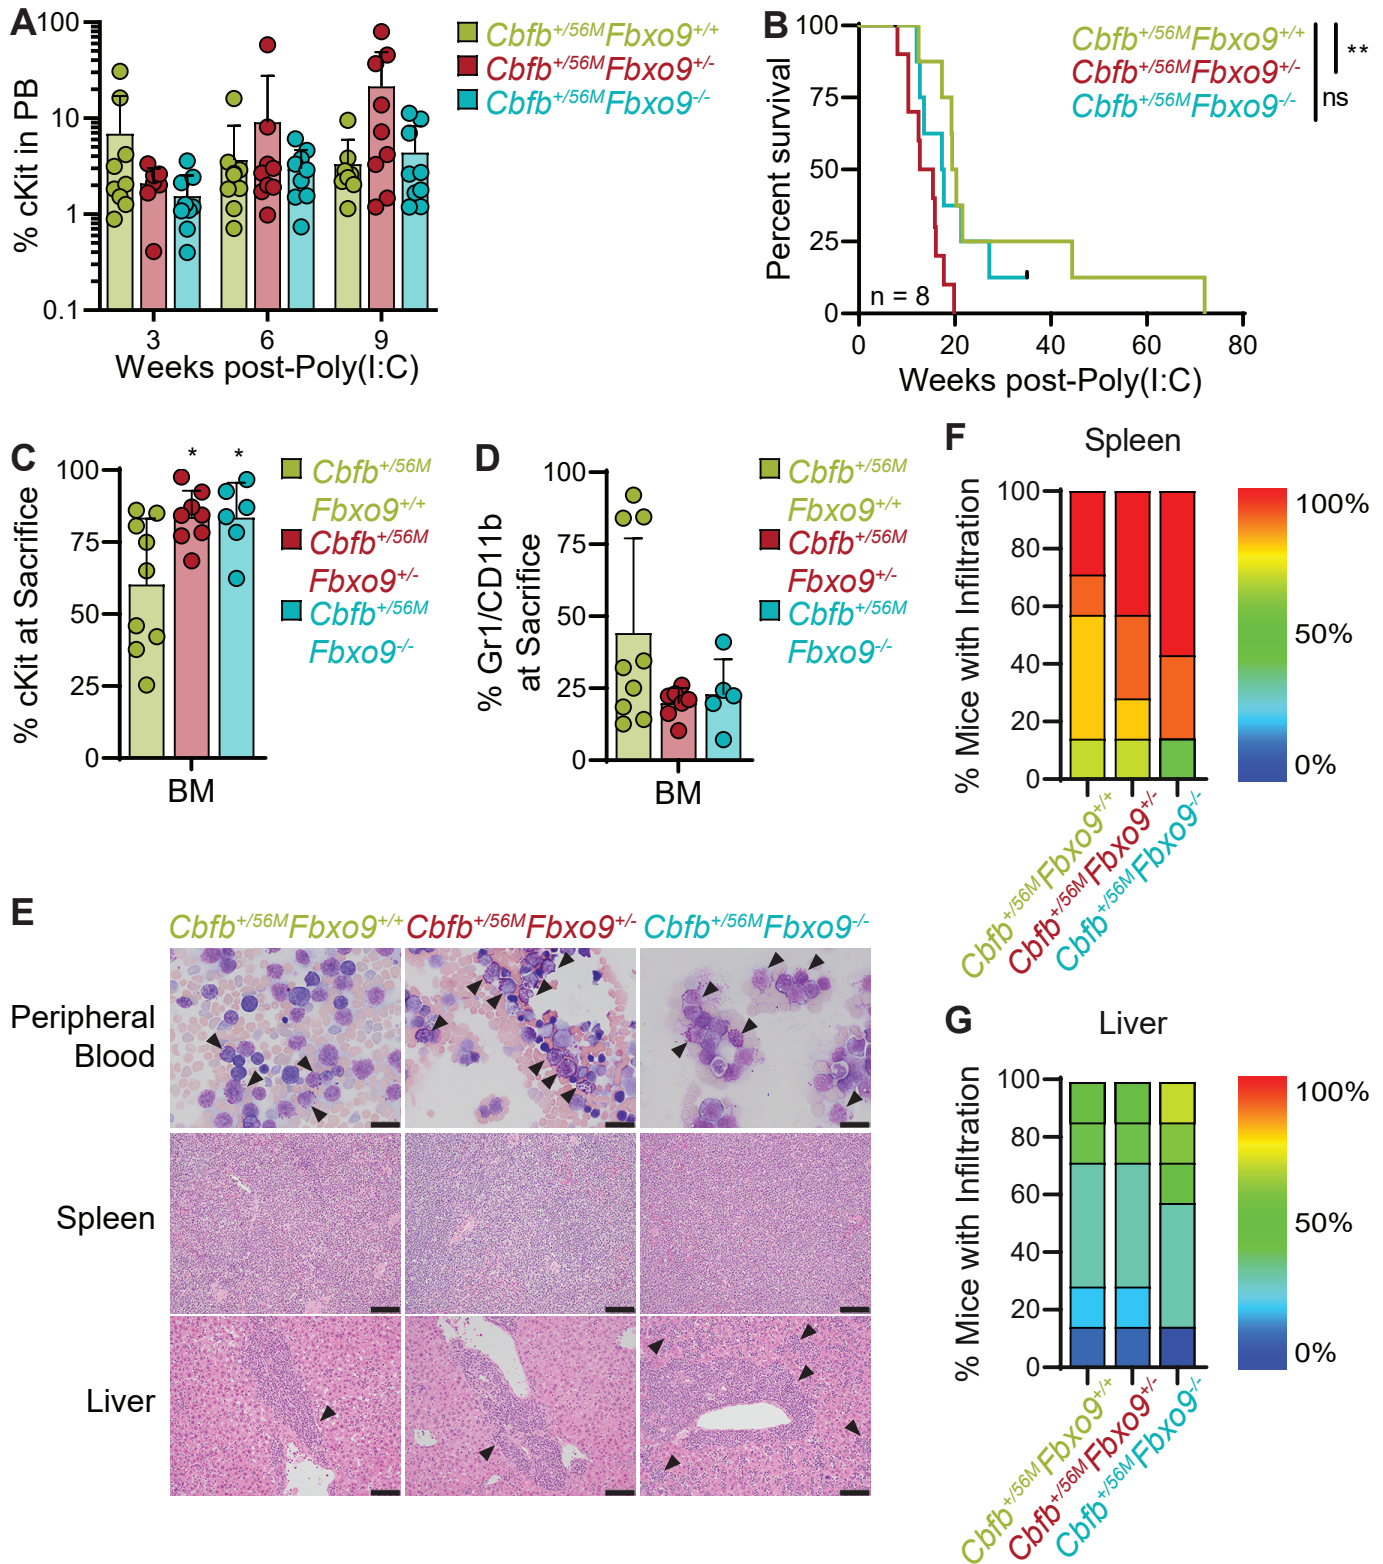

## Hynes-Smith et al. Figure 5

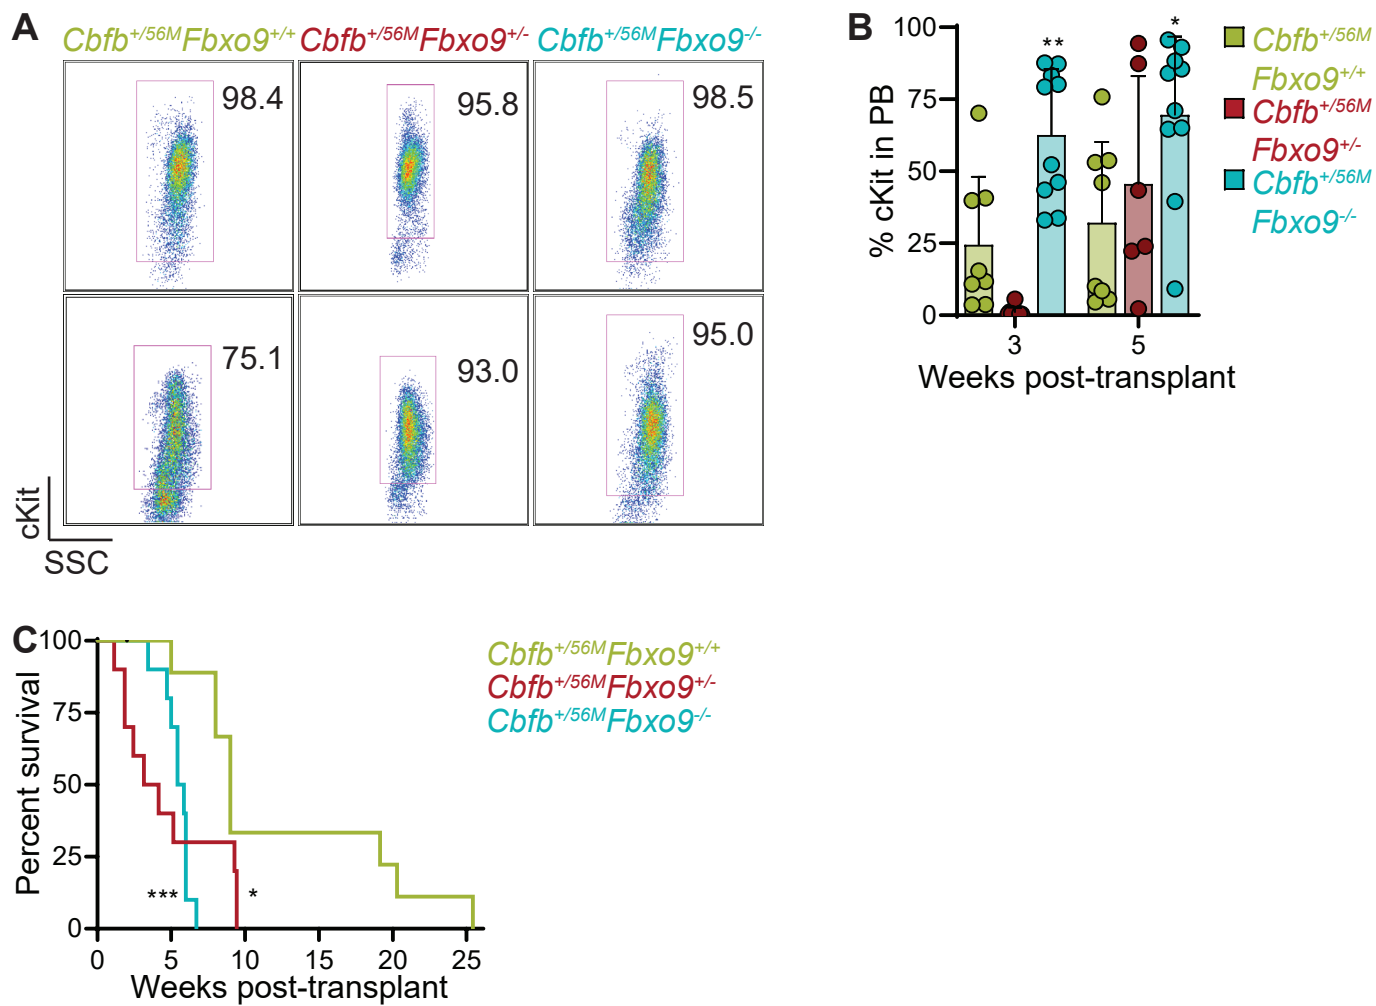

## Hynes-Smith et al. Figure 6

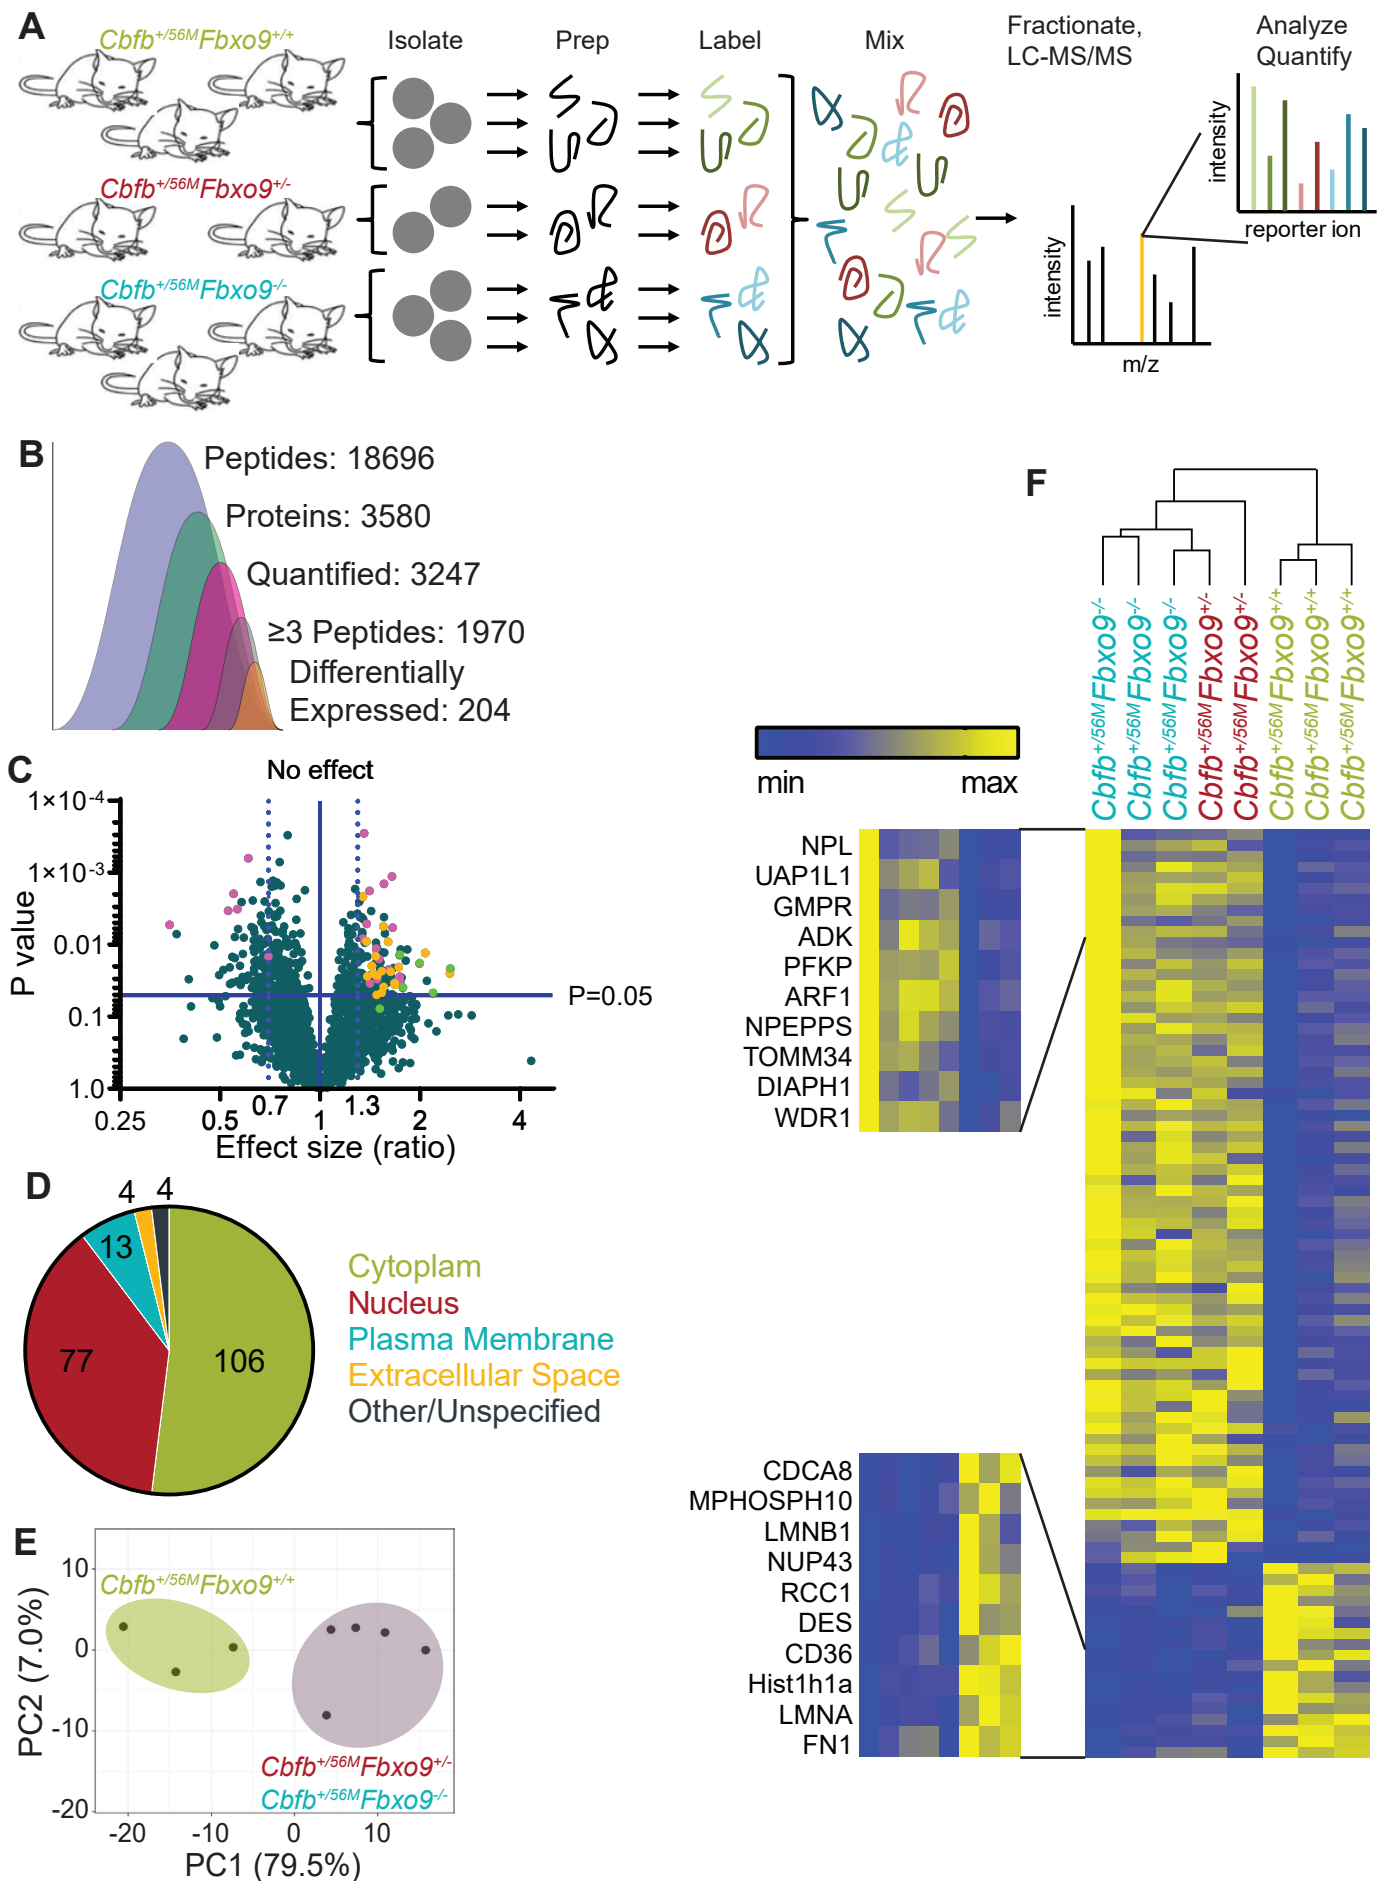

## Hynes-Smith et al. Figure 7

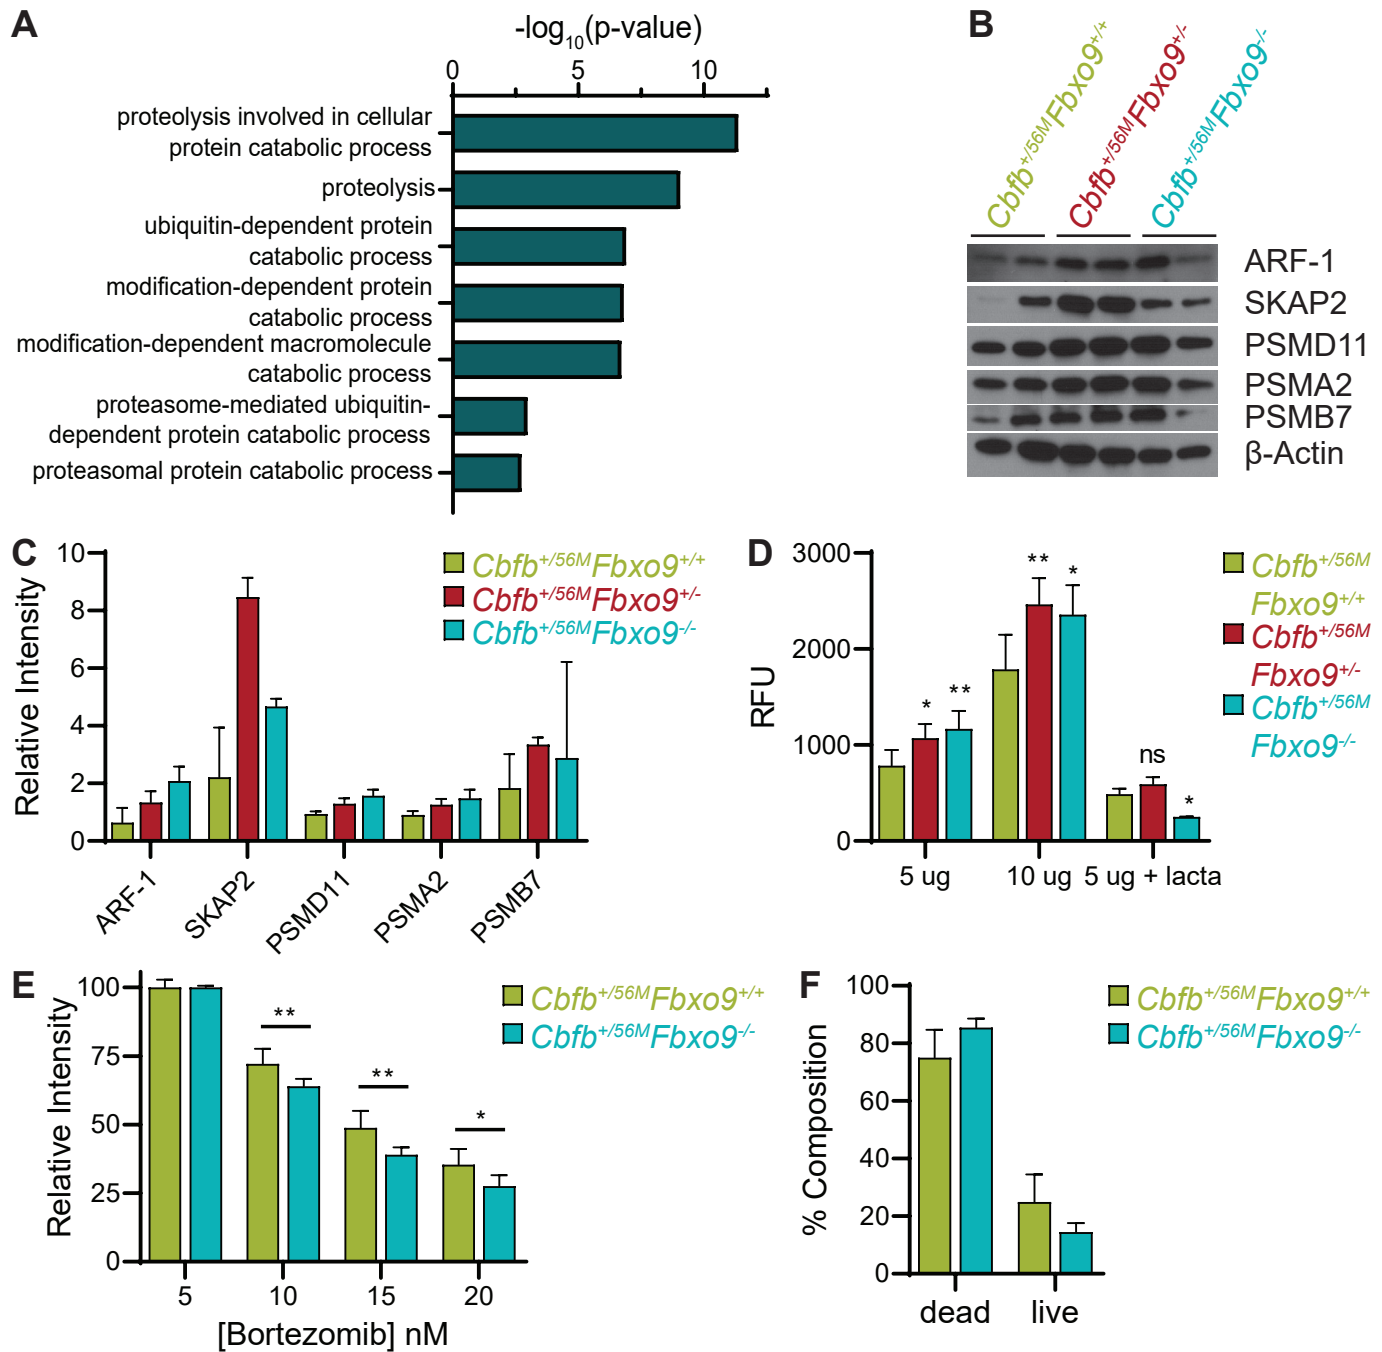

Source: https://www.biorxiv.org/content/10.1101/732198v1.full.pdf
